# Supplementary material for: A completely anoxic microbial fuel cell using a photo-biocathode for cathodic carbon dioxide reduction
Source: Royal Society of Chemistry journal article supplement (doi:10.1039/b901069f), 2009-01-01
Supplement: b901069f.pdf [file b901069f.pdf]

1 **A completely anoxic microbial fuel cell using a**  
2 **photo-biocathode for cathodic carbon dioxide reduction**

3 Xiaoxin CAO, Xia HUANG\*, Peng LIANG, Nico BOON, Mingzhi FAN, Ling ZHANG

4 Supplementary Material (ESI)

5 1 Experimental

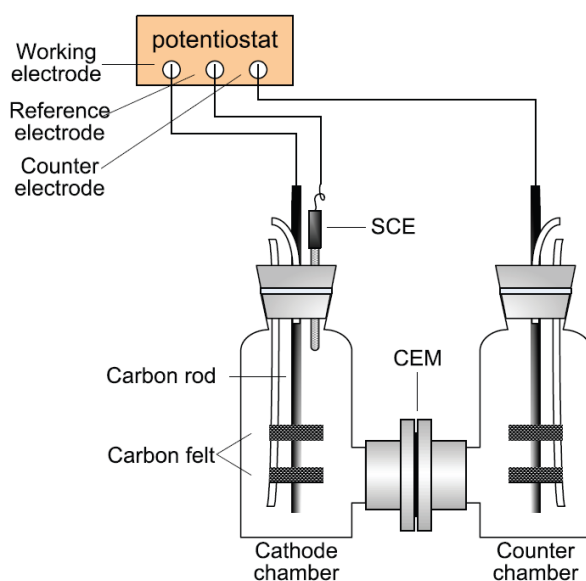

6

7

Fig. S1. Illustration of the MFC during poised potential mode

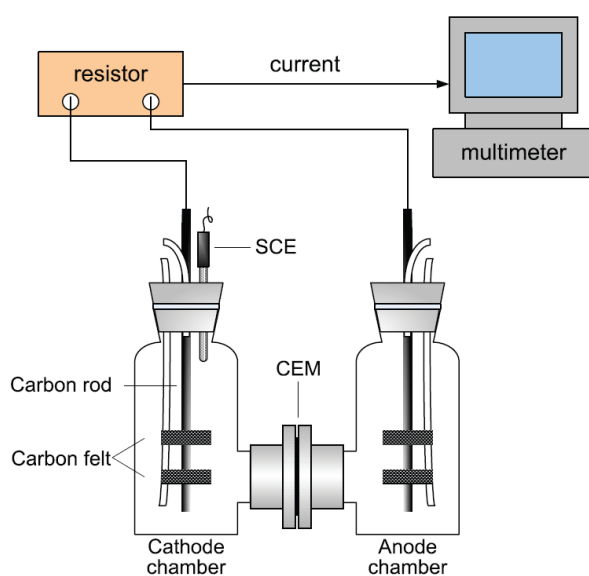

8

9

Fig. S2. Illustration of the MFC during fuel-cell mode

10 2 Proposed electron transfer pathway

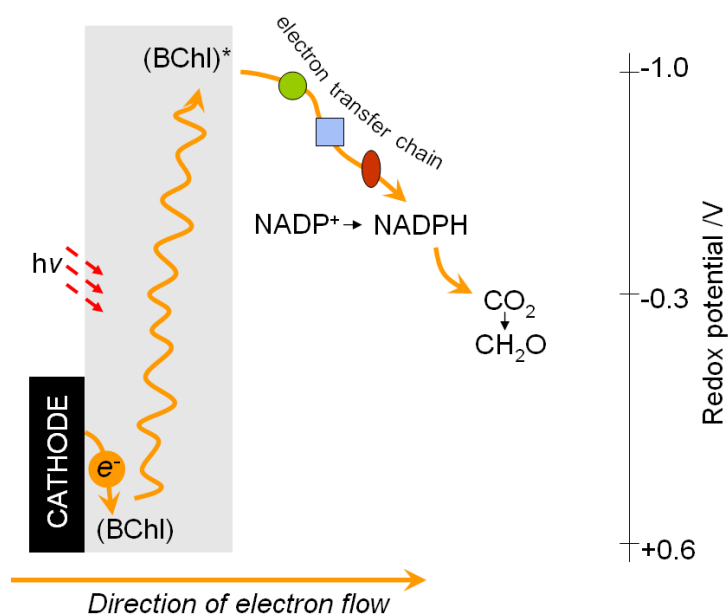

11

12 Fig. S3 Proposed mechanism of electron transfer from cathode to CO<sub>2</sub> via photoautotrophic  
13 organisms (simplified)

14 The midpoint of photo system reaction center in its nonexcited state (indicated as BChl in  
15 Fig.S3) was high, which can accept electrons from electricity generating cathode. By  
16 absorbing solar energy, the BChl was excited to BChl\*, which has a very negative potential.  
17 Then the electrons flowed along the electron transfer chain to the final electron acceptor. In  
18 the whole process, CO<sub>2</sub> was utilized as carbon source and acceptor of reducing equivalents for  
19 cell synthesis<sup>1,2</sup>. The detailed electron transfer mechanism is not clear right now, simplified  
20 half reaction maybe like this<sup>3</sup>:

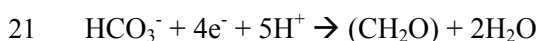

22 where (CH<sub>2</sub>O) represent the approximate formula of cell mass.

23

24

25

26 1. J. M. Olson, *Science*, 1970, **168**, 438-446.

27 2. A. Ehrenreich and F. Widdel, *Appl Environ Microb*, 1994, **60**, 4517-4526.

28 3. F. Widdel, S. Schnell, S. Heising, A. Ehrenreich, B. Assmus and B. Schink, *Nature*, 1993, **362**,  
29 834-836.

30
